# Supplementary figures and images for: Structural and Functional Analysis of the MADS-Box Genes Reveals Their Functions in Cold Stress Responses and Flower Development in Tea Plant (Camellia sinensis)
Source: MDPI journal article supplement (doi:10.3390/plants12162929), 2023-08-13

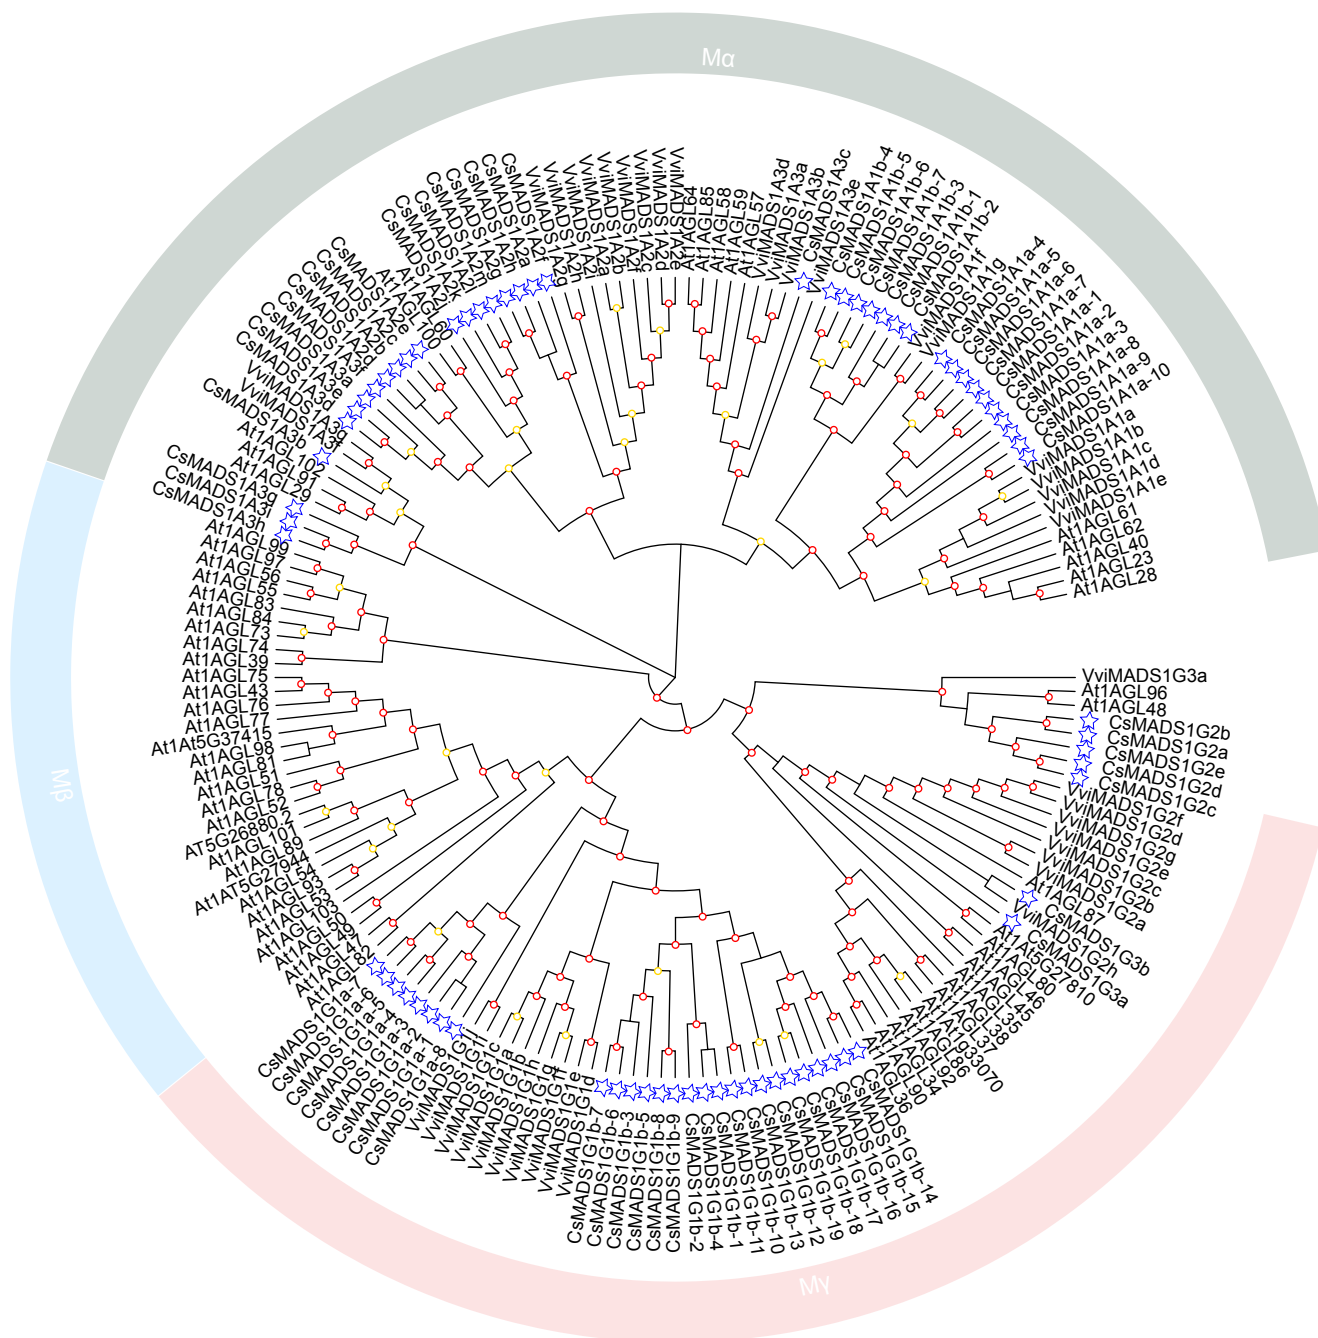

Supplement: s1 [file s1]

## Detailed Identification pipeline of tea MADS-BOX gene family

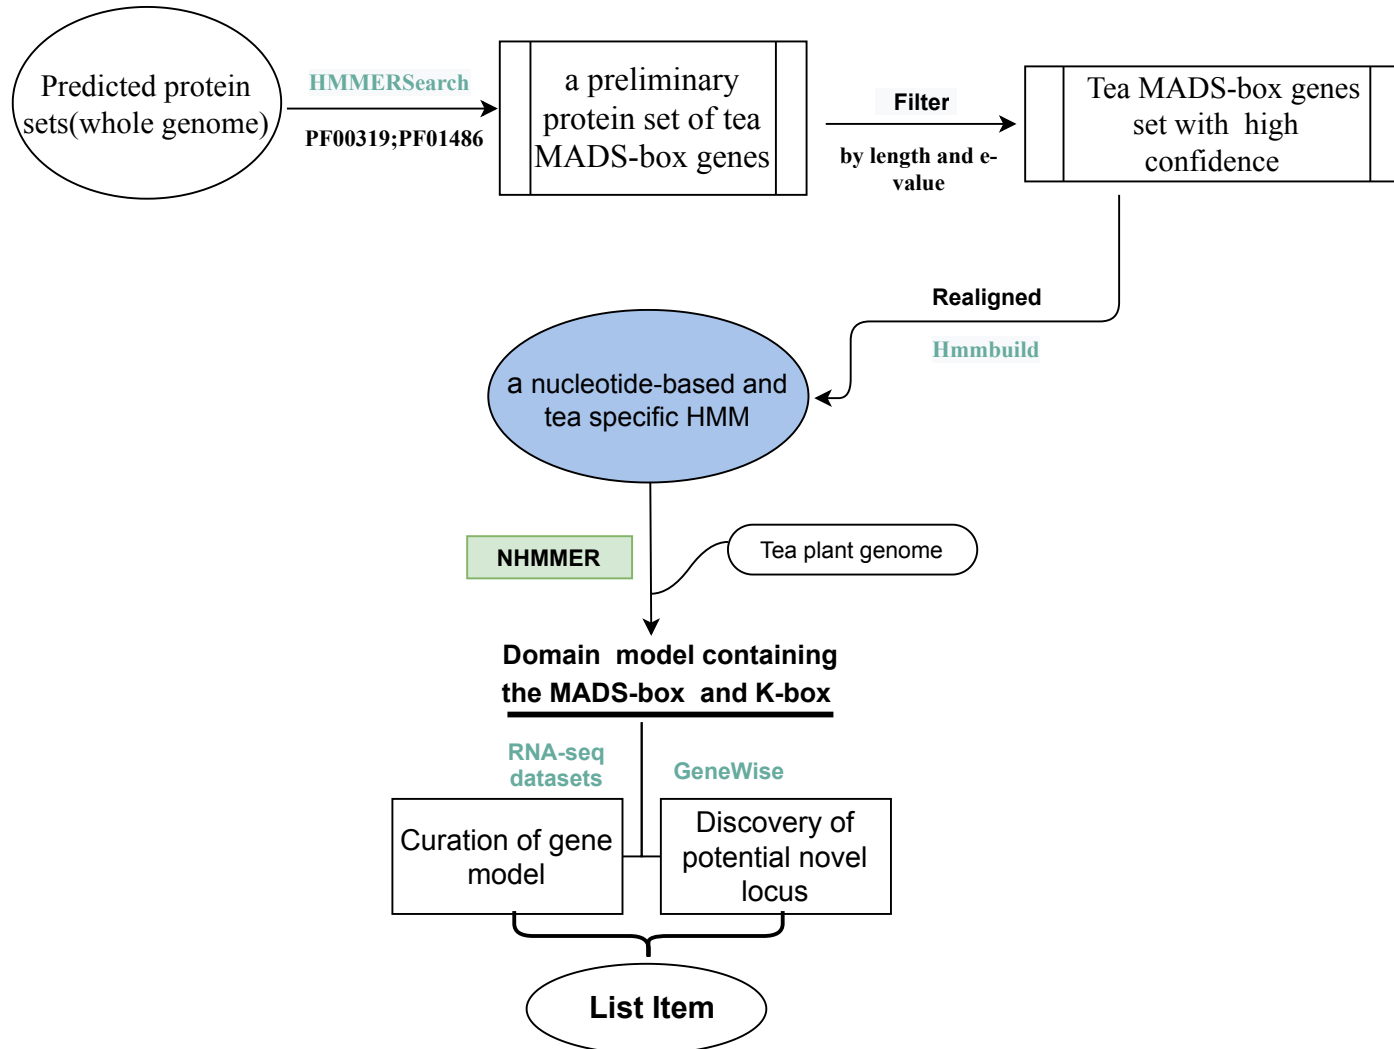

Supplement: s1 [file s1]
